# Supplementary material
Source: PubMed Central journal article supplement (PMC5748180)
Supplement: pnas.201711243SI.pdf [file pnas.201711243SI.pdf]

# Supporting Information

Handley et al. 10.1073/pnas.1711243115

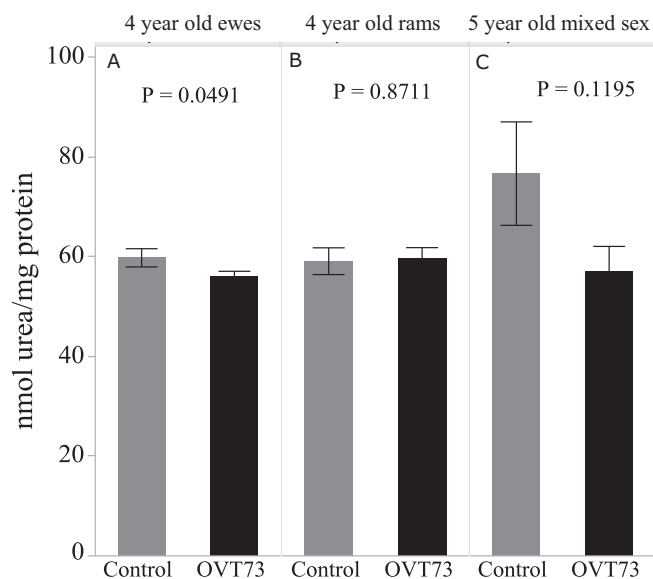

**Fig. S1.** Urea concentration in OVT73 sheep serum. Serum urea was quantified in three separate sheep cohorts: (A) 4-y-old ewes (23 OVT73, 16 control), (B) 4-y-old rams, and (C) mixed-sex 5-y-olds (six OVT73, six control). Average urea concentration (nanomole per milligram of protein  $\pm$  SEM) is presented for OVT73 and control groups. The OVT73 4-y-old ewes show modestly lower serum urea concentration on average compared with controls ( $*P < 0.05$ ; two-way Student's *t* test). SEM, standard error of the mean.



**Table S2. Differential pairwise correlations of gene expression in the OVT73 sheep striatum**

| Gene 1  | Gene 2  | Control correlation, <i>r</i> | Control <i>P</i> value | OVT73 correlation, <i>r</i> | OVT73 <i>P</i> value | Fisher <i>r</i> -to- <i>z</i> <i>P</i> value | BH-adjusted <i>P</i> value |
|---------|---------|-------------------------------|------------------------|-----------------------------|----------------------|----------------------------------------------|----------------------------|
| ITGB4   | RHCG    | -0.93                         | 0.01                   | 0.47                        | 0.35                 | 0.01*                                        | 0.49                       |
| RHCG    | SLC14A1 | -0.29                         | 0.57                   | 0.90                        | 0.01                 | 0.03*                                        | 0.77                       |
| SIAH3   | SMOC2   | -0.13                         | 0.80                   | 0.89                        | 0.02                 | 0.06                                         | 0.79                       |
| CBS     | SLC14A1 | 0.81                          | 0.05                   | -0.28                       | 0.59                 | 0.08                                         | 0.79                       |
| RHCG    | SLC5A7  | 0.75                          | 0.08                   | -0.33                       | 0.53                 | 0.11                                         | 0.79                       |
| CPAMD8  | SMOC2   | -0.68                         | 0.14                   | 0.42                        | 0.40                 | 0.12                                         | 0.79                       |
| CPAMD8  | SIAH3   | -0.51                         | 0.30                   | 0.53                        | 0.28                 | 0.16                                         | 0.79                       |
| OXTR    | RHCG    | 0.49                          | 0.32                   | -0.54                       | 0.27                 | 0.16                                         | 0.79                       |
| SIAH3   | SLC14A1 | 0.13                          | 0.80                   | 0.85                        | 0.03                 | 0.16                                         | 0.79                       |
| ETV5    | SLC14A1 | 0.35                          | 0.49                   | -0.63                       | 0.18                 | 0.17                                         | 0.79                       |
| CPAMD8  | RHCG    | -0.27                         | 0.60                   | 0.65                        | 0.16                 | 0.20                                         | 0.80                       |
| CPAMD8  | SLC14A1 | -0.080                        | 0.89                   | 0.74                        | 0.09                 | 0.20                                         | 0.80                       |
| RHCG    | SMOC2   | -0.34                         | 0.51                   | 0.50                        | 0.31                 | 0.27                                         | 0.82                       |
| ETV5    | RHCG    | 0.43                          | 0.40                   | -0.42                       | 0.41                 | 0.27                                         | 0.82                       |
| SLC5A7  | SMOC2   | -0.30                         | 0.57                   | 0.52                        | 0.29                 | 0.28                                         | 0.82                       |
| ITGB4   | SIAH3   | -0.56                         | 0.25                   | 0.24                        | 0.65                 | 0.28                                         | 0.82                       |
| OXTR    | SMOC2   | 0.30                          | 0.57                   | -0.46                       | 0.36                 | 0.33                                         | 0.90                       |
| CBS     | SIAH3   | 0.57                          | 0.24                   | -0.10                       | 0.85                 | 0.36                                         | 0.94                       |
| OXTR    | SIAH3   | -0.13                         | 0.80                   | -0.65                       | 0.17                 | 0.44                                         | 0.95                       |
| SLC14A1 | SMOC2   | 0.40                          | 0.43                   | 0.78                        | 0.07                 | 0.46                                         | 0.95                       |
| ETV5    | SMOC2   | 0.16                          | 0.76                   | -0.41                       | 0.42                 | 0.46                                         | 0.95                       |
| CBS     | RHCG    | 0.16                          | 0.77                   | -0.39                       | 0.45                 | 0.49                                         | 0.95                       |
| CPAMD8  | ETV5    | -0.14                         | 0.80                   | -0.57                       | 0.24                 | 0.53                                         | 0.95                       |
| ITGB4   | SLC14A1 | -0.02                         | 0.96                   | 0.44                        | 0.38                 | 0.54                                         | 0.95                       |
| SIAH3   | SLC5A7  | 0.65                          | 0.17                   | 0.29                        | 0.57                 | 0.57                                         | 0.95                       |
| SLC14A1 | SLC5A7  | 0.33                          | 0.52                   | -0.10                       | 0.85                 | 0.59                                         | 0.95                       |
| RHCG    | SIAH3   | 0.42                          | 0.40                   | 0.71                        | 0.11                 | 0.59                                         | 0.95                       |
| CPAMD8  | ITGB4   | 0.51                          | 0.31                   | 0.75                        | 0.09                 | 0.62                                         | 0.95                       |
| CBS     | ITGB4   | -0.50                         | 0.31                   | -0.74                       | 0.09                 | 0.62                                         | 0.95                       |
| ETV5    | OXTR    | 0.31                          | 0.55                   | -0.08                       | 0.88                 | 0.62                                         | 0.95                       |
| CBS     | CPAMD8  | -0.54                         | 0.27                   | -0.22                       | 0.67                 | 0.64                                         | 0.95                       |
| CPAMD8  | SLC5A7  | -0.18                         | 0.74                   | -0.48                       | 0.33                 | 0.67                                         | 0.95                       |
| CPAMD8  | OXTR    | -0.53                         | 0.28                   | -0.73                       | 0.10                 | 0.67                                         | 0.95                       |
| ETV5    | SLC5A7  | 0.52                          | 0.29                   | 0.25                        | 0.63                 | 0.70                                         | 0.95                       |
| ITGB4   | SLC5A7  | -0.85                         | 0.03                   | -0.74                       | 0.09                 | 0.72                                         | 0.95                       |
| CBS     | SMOC2   | 0.45                          | 0.37                   | 0.19                        | 0.72                 | 0.73                                         | 0.95                       |
| OXTR    | SLC5A7  | -0.09                         | 0.87                   | 0.13                        | 0.81                 | 0.79                                         | 0.95                       |
| ETV5    | SIAH3   | -0.09                         | 0.87                   | -0.28                       | 0.59                 | 0.81                                         | 0.95                       |
| CBS     | SLC5A7  | 0.63                          | 0.18                   | 0.57                        | 0.24                 | 0.90                                         | 0.98                       |
| ITGB4   | SMOC2   | 0.05                          | 0.93                   | -0.05                       | 0.93                 | 0.91                                         | 0.98                       |
| CBS     | OXTR    | -0.24                         | 0.65                   | -0.16                       | 0.77                 | 0.92                                         | 0.98                       |
| ETV5    | ITGB4   | -0.52                         | 0.29                   | -0.46                       | 0.36                 | 0.92                                         | 0.98                       |
| OXTR    | SLC14A1 | -0.58                         | 0.23                   | -0.55                       | 0.26                 | 0.95                                         | 0.98                       |
| CBS     | ETV5    | 0.39                          | 0.44                   | 0.42                        | 0.41                 | 0.97                                         | 0.98                       |
| ITGB4   | OXTR    | -0.42                         | 0.41                   | -0.40                       | 0.43                 | 0.98                                         | 0.98                       |

Pairwise (Pearson) correlations are shown for all possible pairings of the 10 differentially expressed genes in the OVT73 anterior striatum (OVT73/control,  $P < 0.05$ ; refer to Fig. 1), as quantified by NanoString nCounter analysis. Correlation coefficients ( $r$ ) and associated  $P$  values are shown for each gene pairing, within OVT73 ( $n = 6$ ) and control ( $n = 6$ ) groups. \* $P < 0.05$ , Fisher  $r$ -to- $z$  transformation. No differences were significant after Benjamini–Hochberg (BH) adjustment of the  $P$  values.

**Table S3. Expression of key urea cycle enzymes quantified in RNA-seq data from sheep striatum tissue**

| Animal                                     | Status       | Genes of the urea cycle |             |            |             |            |             |             |
|--------------------------------------------|--------------|-------------------------|-------------|------------|-------------|------------|-------------|-------------|
|                                            |              | <i>NAGS</i>             | <i>CPS1</i> | <i>OTC</i> | <i>ASS1</i> | <i>ASL</i> | <i>ARG1</i> | <i>ARG2</i> |
| 1                                          | Control      | 0.148                   | 0.000       | 0.000      | 4.226       | 2.867      | 0.646       | 0.327       |
| 2                                          | Control      | 0.128                   | 0.005       | 0.000      | 3.374       | 2.464      | 0.814       | 0.417       |
| 3                                          | Control      | 0.149                   | 0.008       | 0.009      | 4.062       | 2.132      | 0.564       | 0.428       |
| 4                                          | Control      | 0.233                   | 0.004       | 0.000      | 3.820       | 1.819      | 0.550       | 0.524       |
| 5                                          | Control      | 0.229                   | 0.000       | 0.000      | 6.339       | 2.267      | 0.507       | 0.377       |
| 6                                          | Control      | 0.112                   | 0.008       | 0.000      | 2.754       | 1.384      | 0.649       | 0.438       |
| 7                                          | <i>OVT73</i> | 0.208                   | 0.009       | 0.000      | 5.055       | 2.546      | 0.749       | 0.341       |
| 8                                          | <i>OVT73</i> | 0.227                   | 0.018       | 0.000      | 6.324       | 2.662      | 0.565       | 0.463       |
| 9                                          | <i>OVT73</i> | 0.212                   | 0.000       | 0.000      | 5.807       | 2.251      | 0.476       | 0.533       |
| 10                                         | <i>OVT73</i> | 0.166                   | 0.000       | 0.000      | 6.914       | 2.072      | 0.550       | 0.397       |
| 11                                         | <i>OVT73</i> | 0.160                   | 0.000       | 0.000      | 3.584       | 1.606      | 0.604       | 0.558       |
| 12                                         | <i>OVT73</i> | 0.184                   | 0.004       | 0.000      | 3.574       | 2.177      | 0.459       | 0.472       |
| Mean control                               |              | 0.167                   | 0.004       | 0.002      | 4.096       | 2.156      | 0.622       | 0.419       |
| Mean <i>OVT73</i>                          |              | 0.193                   | 0.005       | 0.000      | 5.210       | 2.219      | 0.567       | 0.461       |
| <i>P</i> value ( <i>OVT73</i> vs. control) |              | 0.296                   | 0.768       | 0.341      | 0.173       | 0.812      | 0.399       | 0.348       |

Expression values are shown for key urea cycle genes quantified in the striatum, as measured in individual sheep ( $n = 6$  control, 6 *OVT73*) by RNA-seq. Values presented are normalized by the FPKM method. There was no significant difference in the expression of any of the urea cycle genes between *OVT73* and control groups ( $*P < 0.05$ , ANOVA). *ARG1*, arginase 1; *ARG2*, arginase 2; *ASL*, arginosuccinate lyase; *ASS1*, arginosuccinate synthase; *CPS1*, carbamoyl phosphate synthase; *NAGS*, *N*-acetylglutamate synthase; *OTC*, ornithine carbomoyltransferase. Expression of *CPS1* and *OTC* in the striatum was absent or negligible in all animals [the median FPKM value in the entire dataset (total RNA) was 0.187].

**Table S4. Transgene and sex effects on urea concentration in the *OVT73* sheep**

| Tissue            | Transgene effect  |                        |                 |                | Sex effect     | Additive model                  |                           |
|-------------------|-------------------|------------------------|-----------------|----------------|----------------|---------------------------------|---------------------------|
|                   | Control $\pm$ SEM | <i>OVT73</i> $\pm$ SEM | Fold difference | <i>P</i> value | <i>P</i> value | Transgene effect <i>P</i> value | Sex effect <i>P</i> value |
| Bladder           | 242.7 $\pm$ 25.3  | 268.1 $\pm$ 16.4       | 1.10            | 0.42           | 0.11           | NA                              | NA                        |
| Heart             | 140.0 $\pm$ 19.3  | 144.1 $\pm$ 6.4        | 1.03            | 0.83           | 0.12           | NA                              | NA                        |
| Kidney            | 104.2 $\pm$ 13.6  | 105.3 $\pm$ 17.3       | 1.01            | 0.97           | 0.002*         | 0.45                            | 0.002*                    |
| Liver             | 120.8 $\pm$ 13.5  | 123.5 $\pm$ 10.5       | 1.02            | 0.87           | 0.25           | NA                              | NA                        |
| Serum             | 76.7 $\pm$ 10.4   | 57.1 $\pm$ 5.0         | 0.74            | 0.12           | 0.01*          | 0.10                            | 0.01*                     |
| Urine             | 809.7 $\pm$ 157.3 | 682.0 $\pm$ 168.0      | 0.84            | 0.59           | 0.005*         | 0.84                            | 0.01*                     |
| Anterior striatum | 154.2 $\pm$ 8.6   | 236.7 $\pm$ 35.2       | 1.54            | 0.02*          | 0.35           | NA                              | NA                        |
| Cerebellum        | 46.6 $\pm$ 19.8   | 81.4 $\pm$ 17.5        | 1.75            | 0.22           | <0.0001*       | 0.04*                           | <0.0001*                  |
| Hippocampus       | 66.9 $\pm$ 9.1    | 54.0 $\pm$ 5.8         | 0.81            | 0.26           | 0.19           | NA                              | NA                        |
| Motor cortex      | 52.7 $\pm$ 12.5   | 69.9 $\pm$ 10.3        | 1.33            | 0.31           | 0.02*          | 0.40                            | 0.03*                     |

Urea was quantified by biochemical assay in peripheral (bladder, heart, kidney, liver, serum, and urine) and brain (DM, cerebellum, hippocampus, and motor cortex) tissues dissected from 5-y-old *OVT73* ( $n = 6$ ) and control ( $n = 6$ ) sheep. Mean urea concentration (nanomole per milligram protein) is shown ( $\pm$ SEM) for *OVT73* and control groups and the fold difference (*OVT73*/control). *P* values indicate the statistical significance of the effects on urea concentration of transgene status and sex, respectively ( $*P < 0.05$ ; two-way Student's *t* test). Where a significant effect of sex was observed, an additive statistical model was generated including both transgene status and sex as variables. *P* values for the respective transgene and sex effects within the additive model are shown. Before statistical analysis, urea concentrations for the anterior striatum and kidney were  $\log_{10}$ -transformed to approximate a normal distribution (values shown above are back-transformed). Urea concentration was significantly higher on average in *OVT73* cerebellum compared with controls when variability due to sex was accounted for ( $P = 0.04$ ). NA, not applicable.

Table S5. Mixed-grade HD case cohort

| ID       | Status | Sex    | Age at death, y | PM delay, h | CAG, short | CAG, long | Grade | Cause of death                                  | Additional studies |
|----------|--------|--------|-----------------|-------------|------------|-----------|-------|-------------------------------------------------|--------------------|
| 1        | HD     | Male   | 64              | 19          | 18         | 44        | 3     | Pneumonia                                       | —                  |
| 3        | HD     | Male   | 65              | 6           | 18         | 46        | 2     | Pneumonia                                       | —                  |
| 5        | HD     | Male   | 47              | 41          | 19         | 51        | 3     | Myocardial infarction                           | —                  |
| 7        | HD     | Male   | 62              | 19          | 27         | 41        | 0     | Pulmonary embolism                              | —                  |
| 9        | HD     | Female | 50              | 20          | 16         | 46        | 2     | Pneumonia                                       | —                  |
| 11       | HD     | Male   | 71              | 16          | 19         | 42        | 2     | Pneumonia                                       | —                  |
| 13       | HD     | Female | 53              | 9           | 17         | 53        | 4     | Pneumonia                                       | —                  |
| 15       | HD     | Male   | 48              | 18          | 20         | 45        | 3     | Pneumonia                                       | —                  |
| 17       | HD     | Female | 45              | 15          | 24         | 43        | 2     | Choking                                         | —                  |
| 19       | HD     | Female | 43              | 3.5         | 21         | 49        | 3     | Acute renal failure                             | —                  |
| 21       | HD     | Female | 57              | 19          | 17         | 44        | 2     | Myocardial infarction                           | —                  |
| 23       | HD     | Male   | 45              | 18          | 20         | 49        | 4     | Bronchopneumonia                                | —                  |
| 25       | HD     | Female | 63              | 5.5         | 23         | 44        | 3     | HD                                              | —                  |
| 27       | HD     | Male   | 72              | 5           | 17         | 41        | 1     | Pneumonia                                       | —                  |
| 29       | HD     | Female | 67              | 9           | 15         | 42        | 1     | Myocardial infarction                           | A                  |
| 31       | HD     | Female | 59              | 7           | 23         | 47        | 4     | Bronchopneumonia                                | A                  |
| 32       | HD     | Male   | 44              | 29          | 20         | 51        | 4     | Aspiration pneumonia                            | —                  |
| 34       | HD     | Female | 91              | 18          | 15         | 40        | 2     | Dehydration (gastro-enteritis)                  | —                  |
| 36       | HD     | Female | 62              | 11          | 17         | 45        | 3     | Aspiration pneumonia                            | A                  |
| 38       | HD     | Male   | 58              | 14          | 28         | 44        | 2     | Bronchopneumonia                                | A                  |
| 40       | HD     | Female | 53              | 12          | 21         | 47        | 2     | Pneumonia                                       | —                  |
| 41       | HD     | Male   | 56              | 16          | 16         | 46        | 2     | Pneumonia                                       | —                  |
| 42       | HD     | Male   | 51              | 15.5        | 17         | 48        | 3     | Dehydration                                     | —                  |
| 43       | HD     | Male   | 51              | 15          | 10         | 46        | 2     | Pneumonia                                       | A                  |
| 44       | HD     | Male   | 65              | 14          | 17         | 43        | 2     | Renal failure                                   | A                  |
| 45       | HD     | Male   | 62              | 9           | 18         | 43        | 2     | HD                                              | A                  |
| 46       | HD     | Male   | 83              | 13          | 17         | 42        | 1     | Bronchopneumonia                                | A                  |
| 47       | HD     | Male   | 64              | 20.5        | 27         | 42        | 3     | Pulmonary thromboembolism                       | —                  |
| 48       | HD     | Male   | 63              | 16          | 22         | 43        | 3     | Pulmonary embolism                              | —                  |
| 49       | HD     | Male   | 54              | 6.5         | 20         | 39        | 2     | Pneumonia                                       | —                  |
| 2        | C      | Male   | 81              | 7           | 15         | 18        | —     | Coronary atherosclerosis                        | A                  |
| 4        | C      | Male   | 42              | 14          | nd         | nd        | —     | Chest trauma                                    | —                  |
| 6        | C      | Male   | 41              | 16          | nd         | nd        | —     | Heart disease                                   | —                  |
| 8        | C      | Male   | 61              | 7           | 17         | 19        | —     | Ischemic heart disease                          | A                  |
| 10       | C      | Male   | 89              | 19          | 17         | 19        | —     | Probably atherosclerosis                        | —                  |
| 12       | C      | Male   | 66              | 15          | 15         | 20        | —     | Ischemic heart disease                          | A                  |
| 14       | C      | Male   | 53              | 16.5        | nd         | nd        | —     | Ischemic heart disease                          | —                  |
| 16       | C      | Male   | 73              | 13          | 17         | 23        | —     | Ischemic heart disease                          | A                  |
| 18       | C      | Female | 43              | 26          | 17         | 17        | —     | Nitrogen poisoning                              | —                  |
| 20       | C      | Male   | 60              | 17          | 10         | 17        | —     | Ischemic heart disease                          | —                  |
| 22       | C      | Male   | 59              | 24.5        | 17         | 18        | —     | Aortic aneurysm                                 | —                  |
| 24       | C      | Female | 78              | 20          | 18         | 19        | —     | Aortic aneurysm                                 | —                  |
| 26       | C      | Male   | 41              | 16          | 18         | 22        | —     | Asphyxia                                        | —                  |
| 28       | C      | Female | 72              | 19          | 17         | 19        | —     | Ruptured myocardial infarction                  | —                  |
| 30       | C      | Male   | 56              | 23          | nd         | nd        | —     | Asphyxia                                        | —                  |
| 33       | C      | Male   | 48              | 23          | 17         | 20        | —     | Ischemic heart disease                          | —                  |
| 37       | C      | Female | 63              | 16          | 14         | 16        | —     | Dissecting aortic aneurysm                      | —                  |
| 39       | C      | Female | 77              | 13          | nd         | nd        | —     | Ischemic heart disease–coronary atherosclerosis | —                  |
| Averages | HD     |        | 58.9            | 14.7        | 19.3       | 44.9      |       |                                                 |                    |
|          | Non-HD |        | 61.3            | 16.9        | 16.1       | 19.0      |       |                                                 |                    |

Cerebellum and SFG tissue was obtained from 30 postmortem HD cases (19 male, 11 female) and 18 non-HD individuals (13 male, 5 female) matched for age at death and postmortem delay. Also shown is the number of CAG units within *HTT* exon 1 as determined for each allele (short, long), Vonsattel neuropathological grade at postmortem examination, and cause of death as stated on death certificate. nd, not disclosed. Where a sample was previously assessed for urea quantification by Patassini et al. (21), this is indicated by an "A." Note that study ID refers only to the coded ID of a sample for this study and not to the ID of the sample where it was used in additional studies.

**Table S6. Urea is elevated in brain tissue from a large HD case cohort using two methods of quantification**

| Method of quantification | Tissue     | New cases only, 22 HD, 14 control |              |                | Full dataset, 30 HD, 18 control |              |                |
|--------------------------|------------|-----------------------------------|--------------|----------------|---------------------------------|--------------|----------------|
|                          |            | Control, CI                       | HD, CI       | <i>P</i> value | Control, CI                     | HD, CI       | <i>P</i> value |
| Biochemical assay        | Cerebellum | 40.6, 124.2                       | 179.5, 422.7 | 0.0002*        | 58.9, 126.4                     | 274.6, 565.7 | <0.0001*       |
| Biochemical assay        | SFG        | 63.2, 171.6                       | 207.4, 473.2 | 0.003*         | 74.7, 157.1                     | 298.0, 613.9 | <0.0001*       |
| GC-MS                    | Cerebellum | 4.0, 8.3                          | 10.1, 19.7   | 0.002*         | 4.7, 8.1                        | 13.4, 23.9   | 0.0001*        |
| GC-MS                    | SFG        | 3.0, 6.5                          | 7.6, 15.6    | 0.004*         | 3.6, 6.3                        | 10.4, 19.2   | 0.0003*        |

Urea was quantified by biochemical assay (Abcam ab83362) and gas chromatography-mass spectrometry (GC-MS) in cerebellum and SFG tissue isolated from postmortem HD cases and controls, including repeated quantification of four control and eight HD samples that were previously assessed (21). Values shown compare the 95% confidence interval (CI) for urea concentration in control and HD groups and *P* value. New cases only: data for cases presented for the first time in this study (*n* = 22 HD, 14 control). Full dataset: data for all samples assessed in this study (*n* = 30 HD, 18 control). Refer to Table S4 for further sample description.

**Table S7. Low-grade HD case cohort**

| ID             | Status | Sex    | Age at death, y | Age at onset, y* | PM delay, h | CAG, short | CAG, long | Grade | Cause of death                        | Additional studies |
|----------------|--------|--------|-----------------|------------------|-------------|------------|-----------|-------|---------------------------------------|--------------------|
| 1              | HD     | Male   | 62              | 52               | 19          | 27         | 41        | 0     | Pulmonary embolism                    | B                  |
| 3              | HD     | Male   | 32              | 31               | 14          | 17         | 47        | 1     | Submandibular squamous cell carcinoma |                    |
| 5              | HD     | Female | 67              | 47               | 9           | 15         | 42        | 1     | Myocardial infarction                 | A, B               |
| 7              | HD     | Male   | 83              | 40               | 13          | 17         | 42        | 1     | Bronchopneumonia                      | A, B               |
| 9              | HD     | Male   | 72              | 40 <sup>†</sup>  | 5           | 14         | 41        | 0/1   | Pneumonia                             | B                  |
| 11             | HD     | Male   | 41              | 35               | 11          | 19         | 39        | 1     | Renal failure                         |                    |
| 13             | HD     | Female | 70              | 35               | 5           | 17         | 40        | 0     | Septicaemia                           |                    |
| 2              | Non-HD | Male   | 41              | —                | 16          | 18         | 22        | —     | Asphyxia                              | B                  |
| 4              | Non-HD | Female | 72              | —                | 99          | 15         | 17        | —     | Emphysema                             |                    |
| 6              | Non-HD | Male   | 83              | —                | 14          | 19         | 24        | —     | Ruptured abdominal aortic aneurysm    |                    |
| 8              | Non-HD | Male   | 32              | —                | 13          | nd         | nd        | —     | Pulmonary embolism postsurgery        |                    |
| 10             | Non-HD | Male   | 73              | —                | 13          | 17         | 23        | —     | Ischemic heart disease                | A, B               |
| 12             | Non-HD | Male   | 61              | —                | 7           | 17         | 19        | —     | Ischemic heart disease                | A, B               |
| 14             | Non-HD | Male   | 61              | —                | 15          | nd         | nd        | —     | Ischemic heart disease                |                    |
| Average HD     |        |        | 61              | 40               | 10.9        | 18.0       | 41.7      |       |                                       |                    |
| Average non-HD |        |        | 60              | —                | 25.3        | 17.2       | 21.0      |       |                                       |                    |

Cerebellum tissue was obtained from seven postmortem HD cases (five male, two female) and seven non-HD individuals (six male, one female), matched for age at death and postmortem delay. Also shown is the number of CAG units within *HTT* exon 1 as determined for each allele (short, long), Vonsattel neuropathological grade at postmortem examination, and cause of death as stated on death certificate. nd, not disclosed. Sample ID relates to the numbered lanes in Fig. 5. Where a sample was also used for the quantification of urea in another HD patient cohort, this is indicated [A, used in mixed-grade HD patient cohort by Patassini et al. (21); B, used in the mixed-grade HD case cohort within this publication (refer to Table S1)].

\*Age at onset is a best estimate based on available information and was determined by Lynette Tippet and Virginia Hogg.

<sup>†</sup>Difficulty in determining age at onset.



**Table S9. Real-time PCR primer sequences for *SLC14A1* quantification in human and sheep tissue**

| Gene           | Forward primer, 5' to 3'   | Reverse primer, 5' to 3'   | Product size, bp | UPL no. | NCBI accession |
|----------------|----------------------------|----------------------------|------------------|---------|----------------|
| <i>Sheep</i>   |                            |                            |                  |         |                |
| <i>SLC14A1</i> | tcagtacccaacgtcacctg       | cagccatataatctgaccacac     | 86               | 96      | NM_001163054   |
| <i>CANX</i>    | ggaactctgtcaggtggatt       | tcatttcacatctacctcccattttc | 97               | 142     | XM_004008385.1 |
| <i>TRIM27</i>  | aagacttaaagaagagcgaagg     | ctgggtcaggctcaagagtt       | 68               | 108     | XM_004019024   |
| <i>YWHAZ</i>   | cgctacttggtgaggttg         | aaaagcttcttggtatgcttgc     | 81               | 9       | NM_001267887.1 |
| <i>Human</i>   |                            |                            |                  |         |                |
| <i>SLC14A1</i> | cttggttcagaacccctggtg      | gccatagagcccagatgctat      | 114              | 20      | NM_001128588   |
| <i>CANX</i>    | aggtagaagactcaaaaccagatacc | tggttgaactggagctttgtaa     | 77               | 63      | NM_001746.3    |
| <i>SDHA</i>    | cagaccatctacggagcagag      | gatgggcttgagtaatcgt        | 102              | 12      | NM_004168      |
| <i>TRIP11</i>  | caaaatgagctccgacaagaa      | caatgaagaggttctcattaggac   | 112              | 42      | NM_004239.3    |

Primer sequences, expected product size (base pairs), and the Universal Probe Library (UPL) probe number are shown for *SLC14A1* and relevant reference genes used in the relative quantification of *SLC14A1* transcript levels in sheep and human tissues. *CANX*, Calnexin; *GAPDH*, Glyceraldehyde-3-Phosphate Dehydrogenase; *SDHA*, Succinate Dehydrogenase Complex Flavoprotein Subunit A; *SLC14A1*, Solute Carrier Family 14 Member 1 (Kidd Blood Group); *TRIM27*, Tripartite Motif Containing 27; *TRIP11*, Thyroid Hormone Receptor Interactor 11; *YWHAZ*, Tyrosine 3-Monooxygenase/Tryptophan 5-Monooxygenase Activation protein Zeta. Reference genes used for normalization were selected for each tissue analyzed, based on the combination that gave the best stability score in geNorm and NormFinder software. For sheep tissues, the most stable reference gene combinations were *CANX* and *YWHAZ* (Cerebellum) and *CANX* and *TRIM27* (motor cortex, striatum). For human cerebellum, the most stable reference gene combination was *SDHA* and *TRIP11*. The geometric mean of the selected reference gene expression was used to normalize *SLC14A1* expression in each respective tissue.

## Other Supporting Information Files

[Dataset S1 \(XLS\)](#)

[Dataset S2 \(XLS\)](#)
